# Supplementary material for: Exploring the BSA- and DNA-binding, cytotoxicity, and cell cycle evaluation of ternary copper(ii)/diimine complexes with N,N-dibenzyl-N′-benzoylthiourea as promising metallodrug candidates
Source: Royal Society of Chemistry journal article supplement (doi:10.1039/d4dt01152j), 2024-01-01
Supplement: d4dt01152j1.pdf [file d4dt01152j1.pdf]

**Exploring the BSA-, DNA-binding, cytotoxicity and cell cycle evaluation  
of ternary copper(II)/diimine complexes with N,N-dibenzyl-N'-  
benzoylthiourea as promising metallodrug candidates**

**Guilherme R. Gonçalves, Tamara Teixeira, Daniel P. Bezerra, Milena B. P. Soares, Valdenizia  
R. Silva, Luciano de S. Santos, Alzir A. Batista, Katia M. Oliveira, Rodrigo S. Correa**

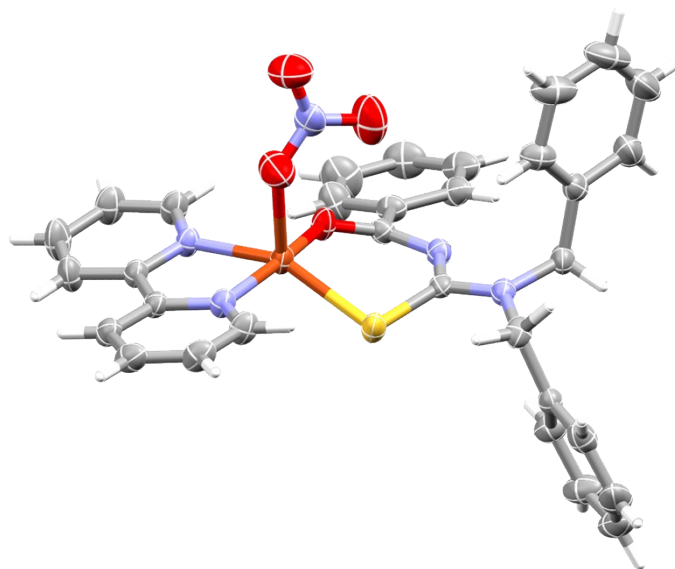

Figure S1. Crystal structure of complex 2.

## Crystal packing of 1

Figure S2. Crystal packing and representation of weak intermolecular contacts of the complex

## Crystal packing of 2

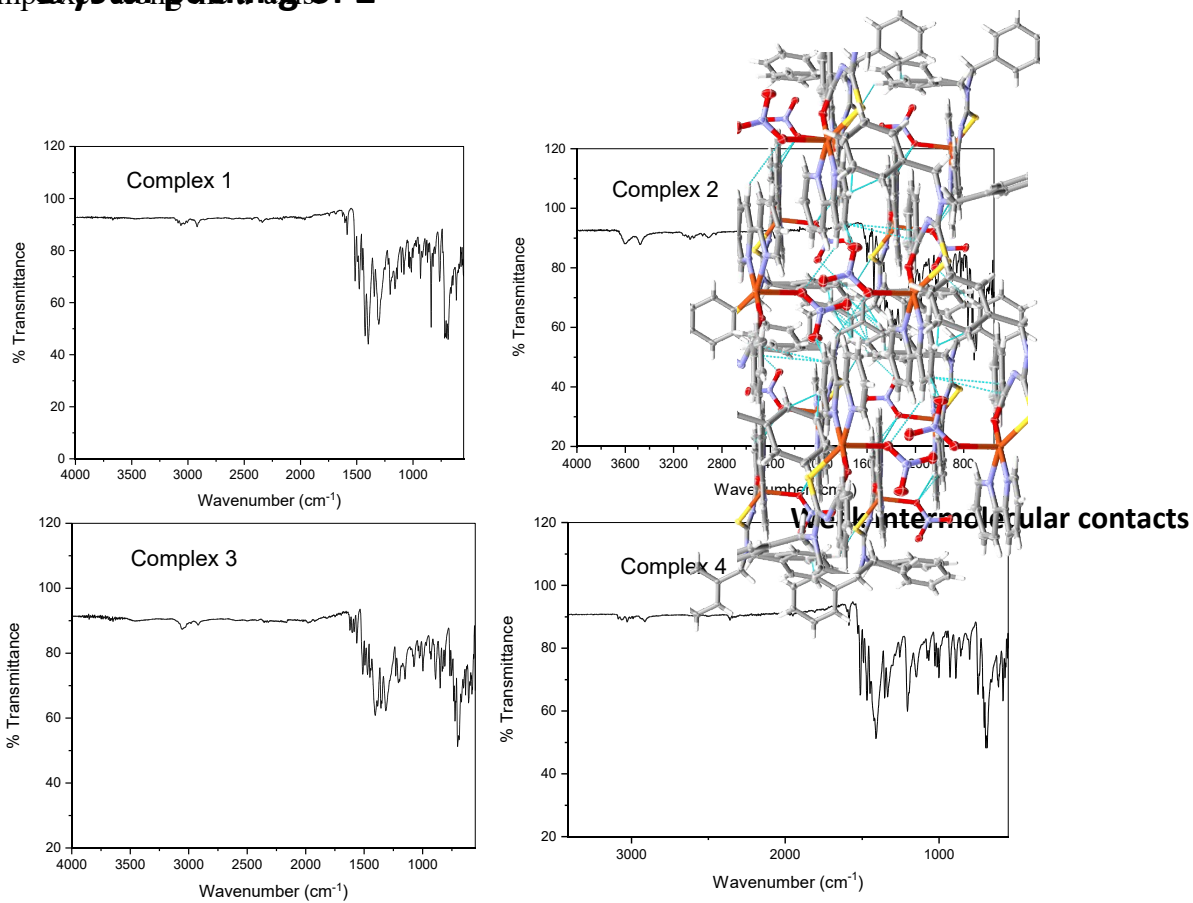

Figure S3. Infrared spectra of complexes 1-4.

Table S1. Infrared assignment for complexes and Th free ligand.

| Assignments                           | Th     | (1)    | (2)    | (3)    | (4)    |
|---------------------------------------|--------|--------|--------|--------|--------|
| $\nu$ N-H                             | 3077   | -      | -      | -      | -      |
| $\nu$ C-H <sub>aromatic</sub>         | 3056 w | 2966 w | 3055 w | 2966 w | 3028 w |
| $\nu$ C-H <sub>(CH<sub>3</sub>)</sub> | -      | -      | -      | -      | 2912 w |
| $\nu$ NO <sub>3</sub> <sup>-</sup>    | -      | 1601 w | 1600 w | 1601 w | 1602 w |
| $\nu$ NO <sub>3</sub> <sup>-</sup>    | -      | 1587 w | 1585 w | 1590 w | 1579 w |
| $\nu$ C=O <sub>(amide)</sub>          | 1687 s | 1514 m | 1512 m | 1542 m | 1512 m |
| $\nu$ C=C <sub>(ring)</sub>           | 1488 s | 1477 m | 1492 m | 1494 m | 1490 m |
| $\nu$ C=C <sub>(ring)</sub>           | 1426 s | 1450 m | 1469 m | 1452 m | 1467 m |
| $\nu$ C=C <sub>(ring)</sub>           | 1417 s | 1433 m | 1446 m | 1436 m | 1448 m |
| $\nu$ C=N                             | -      | 1425 s | 1404 s | 1409 s | 1409 s |
| $\gamma$ CH <sub>3</sub>              | -      | -      | -      | -      | 1255 m |
| $\nu$ C-N <sub>aromatic</sub>         | -      | 1260 m | 1195 m | 1218 m | 1205 m |
| $\nu$ C-N <sub>(thiourea)</sub>       | 1265 m | 1201 m | 1151 m | 1153 m | 1147 m |
| $\nu$ C=S                             | 1189 s | 1014 w | 1074 w | 1029 m | 1000 m |
| $\gamma$ Aromatic Ring                | 946 w  | 946 w  | 997 m  | 935 w  | 927 m  |
| $\gamma$ Aromatic Ring                | 931 w  | 933 w  | 926 m  | 894 w  | 889 m  |
| $\gamma$ Aromatic Ring                | 873 s  | 838 s  | 848 m  | 858 m  | 858 m  |
| $\gamma$ CH( $\phi$ )                 | 792 w  | 821 w  | 827 m  | 825 w  | 746 m  |
| $\gamma$ CH( $\phi$ )                 | 771 w  | 804 w  | 734 s  | 765 s  | 713 s  |
| $\gamma$ CH( $\phi$ )                 | 692 s  | 763 m  | 723 s  | 730 s  | 705 s  |

s = strong; m = medium, w = weak;  $\nu$  = designates a stretching vibration;  $\gamma$  = designates a deformation vibration.

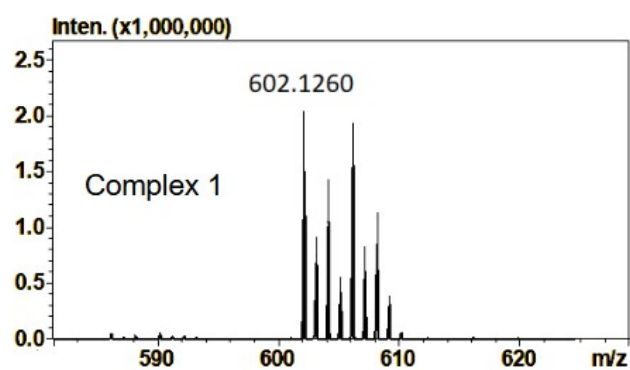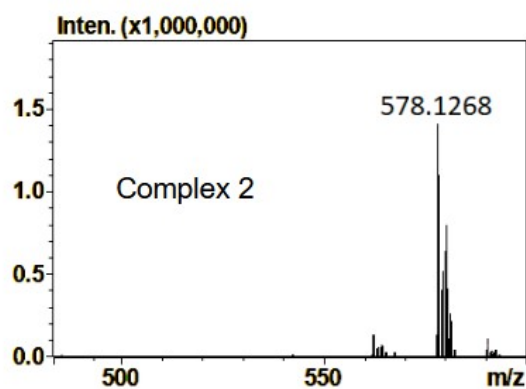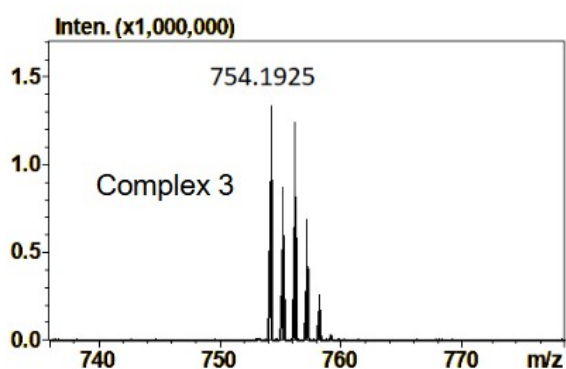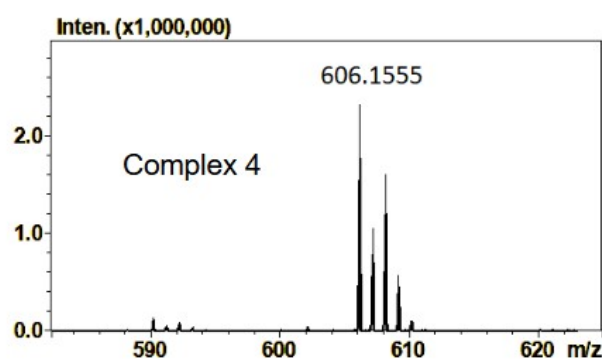

Figure S4 – Mass spectrum of complexes 1, 2, 3 and 4, presenting the monoisotopic mass of the specie  $[M-NO_3]^+$ .

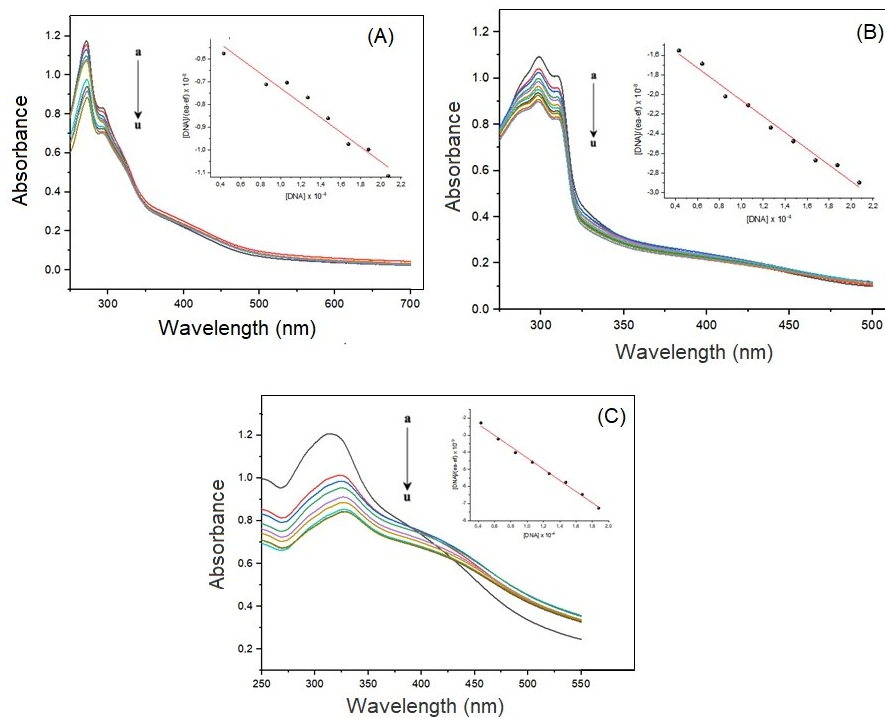

Figure S5 – UV-vis absorption spectrum of complexes 1 (A), 2 (B) and 4 (C) (21  $\mu$ M) in the presence of increasing additions of CT-DNA solution and linear regression for  $K_b$  determination

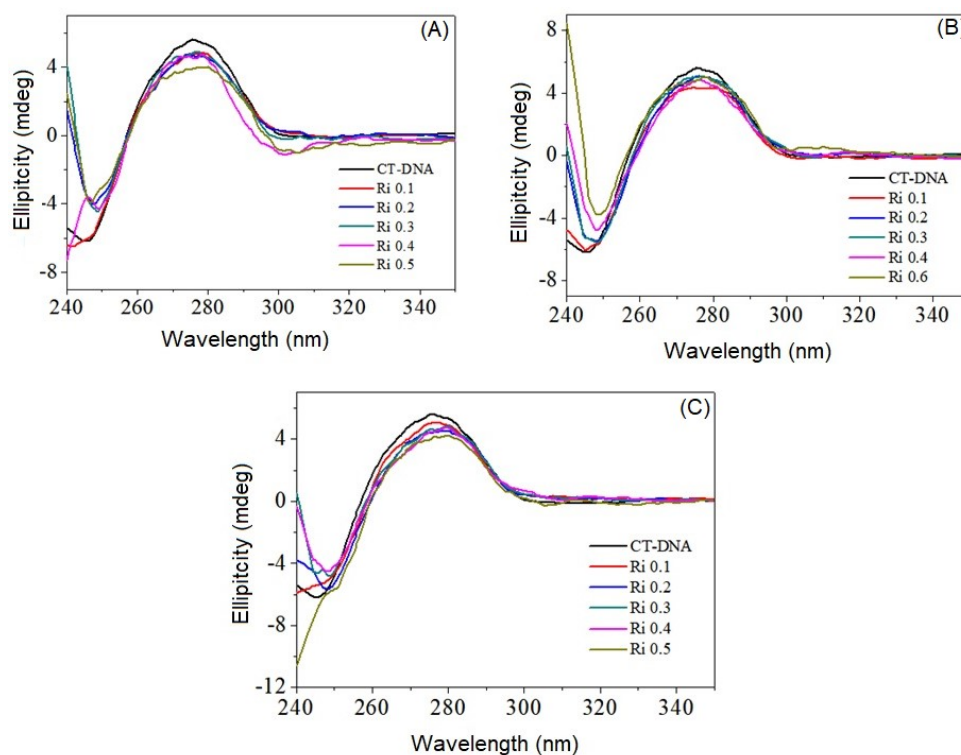

Figure S6 - CD spectra of CT-DNA (50  $\mu$ M) in the presence of compounds 1 (A), 2 (B) and 4 (C) (2.5 - 20  $\mu$ M) in Tris-HCl buffer (pH 7.4) at different molar ratios ( $R_i$ ), where  $R_i = [\text{Complex}]/[\text{CT-DNA}]$ .

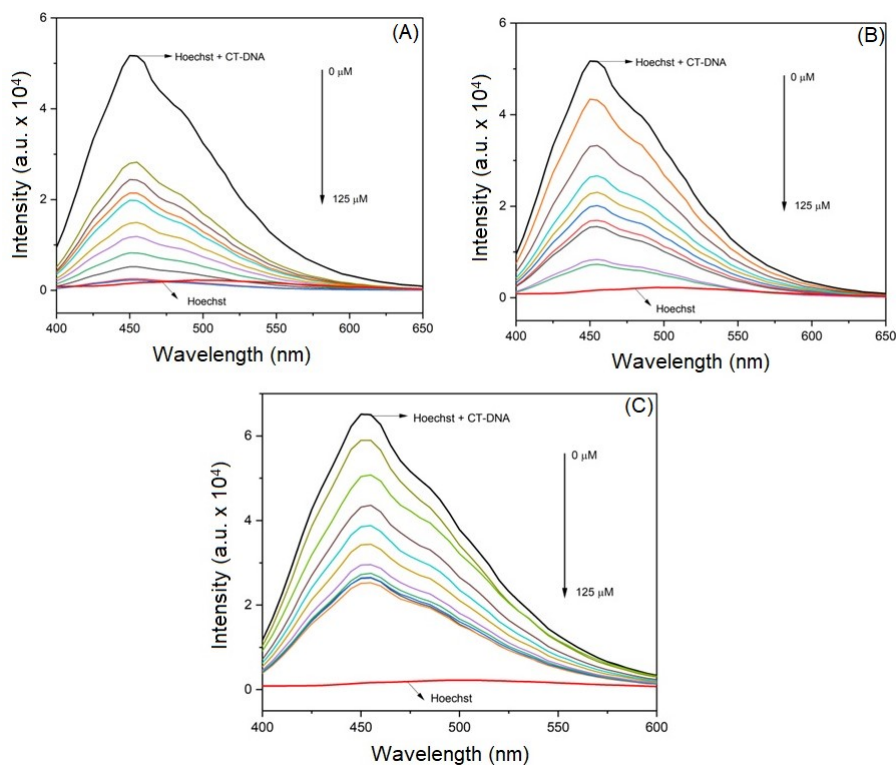

Figure S7 – Emission spectrum of Hoechst 33258 (2.7  $\mu\text{M}$ ) in the absence and presence of CT-DNA solution (125  $\mu\text{M}$ ) ( $\lambda_{\text{ex}}=340\text{ nm}$ ) at 37°C with increasing concentration of compounds 1 (A), 2 (B) and 4 (C).

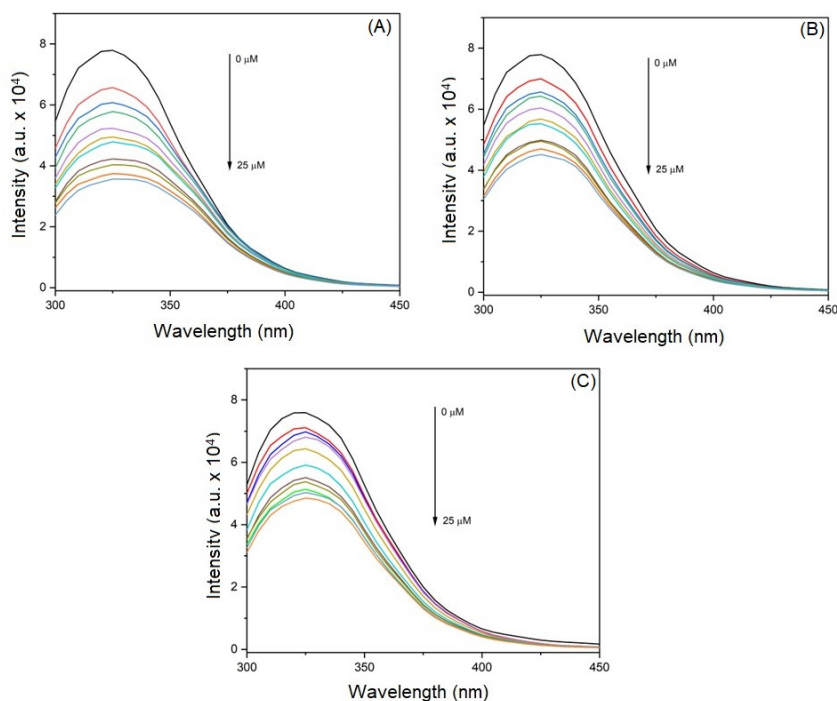

Figure S8 – Emission spectrum of BSA (2.5  $\mu\text{M}$ ) in the absence and in the presence of increasing concentrations of compound compounds 1 (A), 2 (B) and 4 (C) ( $\lambda_{\text{em}}=280\text{ nm}$ ;  $\lambda_{\text{ex}}=340\text{ nm}$ ) at 298 K.

Table S2 - X-Ray crystallographic data collection and refinement parameters for complexes 1 and 2.

|                                   | Complex 1                                                         | Complex 2                                                         |
|-----------------------------------|-------------------------------------------------------------------|-------------------------------------------------------------------|
| Empirical formula                 | C <sub>34</sub> H <sub>27</sub> CuN <sub>5</sub> O <sub>4</sub> S | C <sub>32</sub> H <sub>27</sub> CuN <sub>5</sub> O <sub>4</sub> S |
| Molecular Weight                  | 665.20                                                            | 641.18                                                            |
| Temperature                       | 293(2) K                                                          | 293(2) K                                                          |
| Wavelength                        | 0.71073 Å                                                         | 0.71073 Å                                                         |
| Crystal System                    | Monoclinic                                                        | Monoclinic                                                        |
| Space group                       | P 2 <sub>1</sub> /c                                               | P 2 <sub>1</sub> /c                                               |
| Unit cells dimensions             | a = 15.4463(5) Å;<br>b = 9.6553(2) Å;<br>c = 21.3098(6) Å;        | a = 9.2596(4) Å<br>b = 29.1579(11) Å<br>c = 10.9693(5) Å          |
| Volume                            | 3040.77(15) Å <sup>3</sup>                                        | 2929.1(2) Å <sup>3</sup>                                          |
| Z                                 | 4                                                                 | 4                                                                 |
| Density (calculated)              | 1.453 Mg/m <sup>3</sup>                                           | 1.454 Mg/m <sup>3</sup>                                           |
| Absorption coefficient            | 0.835 mm <sup>-1</sup>                                            | 0.864 mm <sup>-1</sup>                                            |
| F(000)                            | 1372                                                              | 1324                                                              |
| Crystal size                      | 0.580 x 0.510 x 0.280<br>mm <sup>3</sup>                          | 0.642 x 0.142 x 0.104 mm <sup>3</sup>                             |
| Theta range for data collection   | 2.737 to 27.102°.                                                 | 2.780 to 27.102°.                                                 |
| Index ranges                      | -19 ≤ h ≤ 19, -12 ≤ k ≤ 12, -27 ≤ l ≤ 27                          | -11 ≤ h ≤ 11, -37 ≤ k ≤ 37, -14 ≤ l ≤ 14                          |
| Reflections collected             | 65891                                                             | 63608                                                             |
| Independent reflections           | 6695 [R(int) = 0.0292]                                            | 6446 [R(int) = 0.0348]                                            |
| Completeness to theta = 25.242°   | 99.8 %                                                            | 99.9 %                                                            |
| Refinement method                 | Full-matrix least-squares on F <sup>2</sup>                       | Full-matrix least-squares on F <sup>2</sup>                       |
| Data / Restraints / Parameters    | 6695 / 0 / 446                                                    | 6446 / 0 / 388                                                    |
| Goodness-on-fit on F <sup>2</sup> | 1.130                                                             | 1.094                                                             |
| Final R indices [I > 2σ (I)]      | R1 = 0.0387, wR2 = 0.0880                                         | R1 = 0.0478, wR2 = 0.1228                                         |
| R indices (all data)              | R1 = 0.0594, wR2 = 0.1080                                         | R1 = 0.0641, wR2 = 0.1378                                         |
| Largest diff. peak and hole       | 0.510 and -0.313 e.Å <sup>-3</sup>                                | 0.971 and -0.526 e.Å <sup>-3</sup>                                |



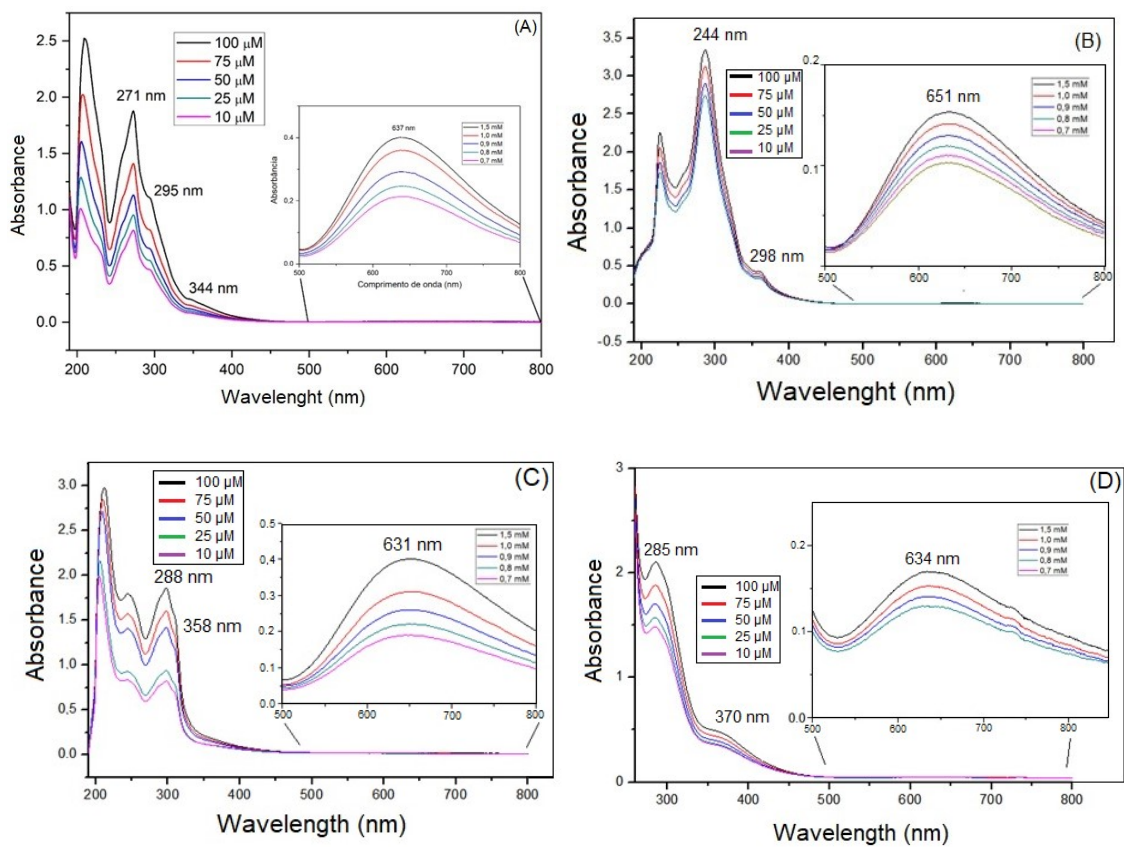

Figure S9. Electronic absorption spectra in the UV-Vis region for complexes (A) 1, (B) 2, (C) 3 and (D) 4, in methanol.

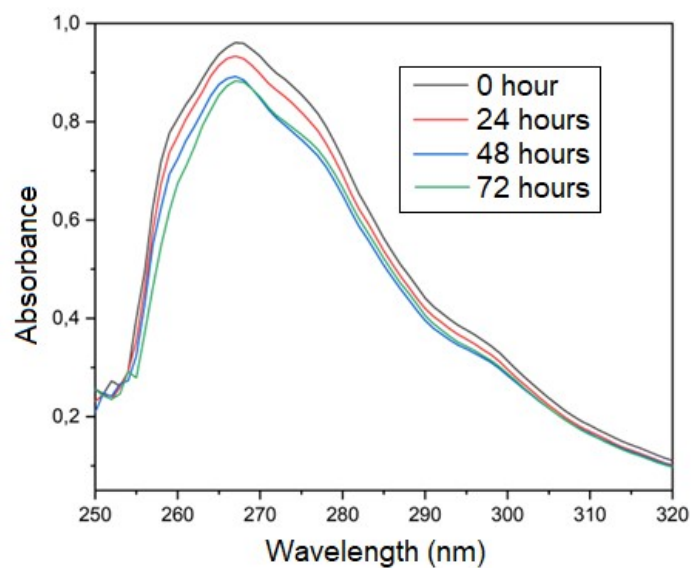

Figure S10- UV-Vis spectra of complex 1 in DMSO at different times.

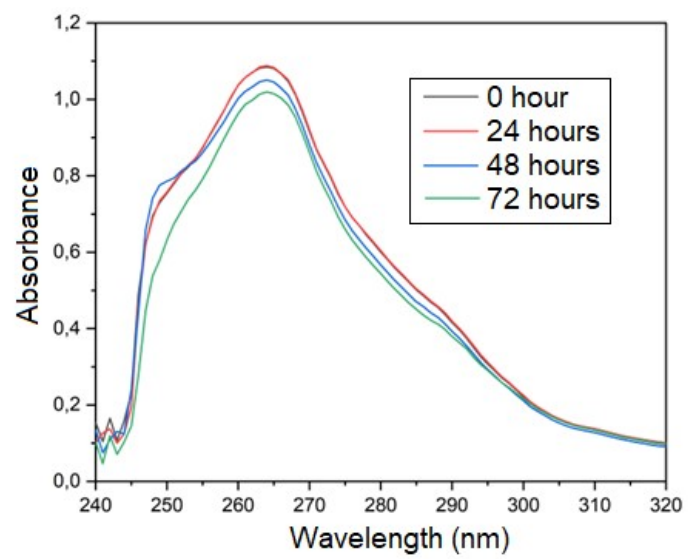

Figure S11 - UV-Vis spectra of complex 1, in DMSO/RPMI (50:50, v/v) at different times.
